# Supplementary material for: Interaction of metal ions and DNA films on gold surfaces: an electrochemical impedance study
Source: Royal Society of Chemistry journal article supplement (doi:10.1039/b821670c), 2009-01-01

## Electronic Supporting Information

### Interaction of Metal Ions and DNA Films on Gold Surfaces: An Electrochemical Impedance Study

Xiaomin Bin and Heinz-Bernhard Kraatz\*

Department of Chemistry, University of Western Ontario, 1151 Richmond Street  
London, Ontario, Canada N6A 5B7

**Figure S1.** Melting curves of ds-DNA **1+2** (a) and **1+3** (b) solution in 50 mM Tris-ClO<sub>4</sub> (pH 8.6).

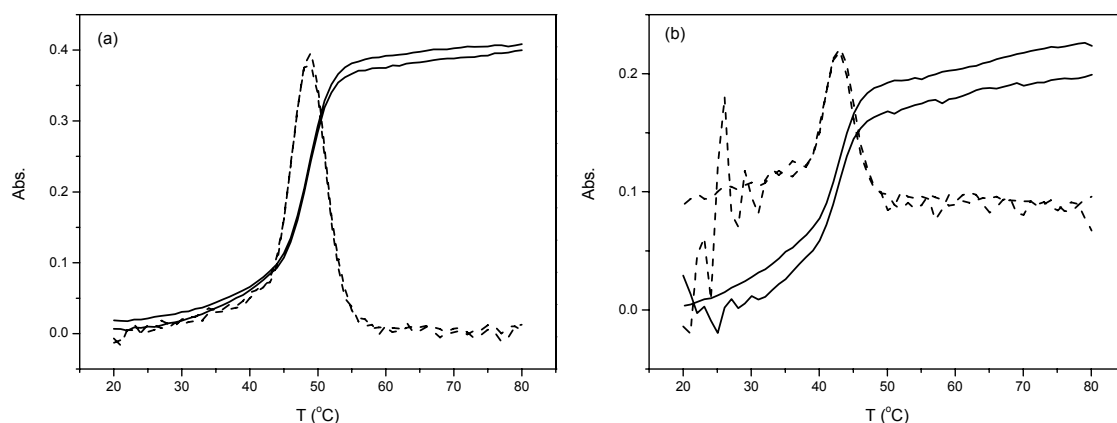

The solid lines are two trials of melting curves, and the dotted lines are the differential curves of the melting curve. From the peak position of the differential curves, the melting points of ds-DNA **1+2** and **1+3** are 49°C and 43 °C, respectively.

**Figure S2.** Equivalent circuits used to fit impedance spectra of ds-DNA monolayer. (A) for impedance spectra of matched ds-DNA films without diffusion; (B) for impedance spectra of ds-DNA monolayer with diffusion part.  $R_s$ , solution resistance;  $C_m$  or  $Q_m$ , capacitance or CPE of monolayer;  $R_{ct}$ , charge-transfer resistance;  $R_x$  and  $Q$ , defects in the monolayer;  $Q_d$  and  $R_d$ , a combination of two parallel diffusion-like elements which give information about the diffusion through the DNA monolayer.

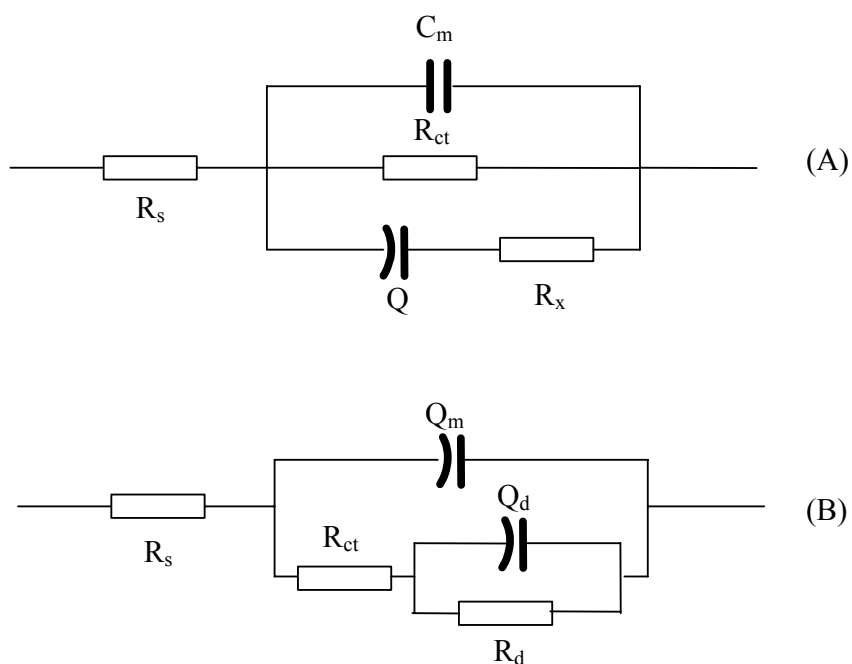

**Table S1.** Equivalent circuit element values for 25 base pair ds-DNA films in the absence and presence of metal ions, and extensively rinsed ds-DNA films on the gold electrode surface. Unit:  $R_s, R_x: (\Omega \bullet \text{cm}^2)$ ;  $R_{ct}: (\text{k}\Omega \bullet \text{cm}^2)$ ;  $C_m: (\mu\text{F} \bullet \text{cm}^2)$ ;  $CPE(Y_o) (Ss^{-0.5} \text{cm}^{-2})$

|                 | $\text{Ca}^{2+}$ |            |            |            |            |            | $\text{Mg}^{2+}$ |            |            |            |            |            | $\text{Al}^{3+}$ |            |            |        |  |  |
|-----------------|------------------|------------|------------|------------|------------|------------|------------------|------------|------------|------------|------------|------------|------------------|------------|------------|--------|--|--|
|                 | ds-DNA           | Ca-DNA     | rinsed     | ds-DNA     | rinsed     | ds-DNA     | Ca-DNA           | rinsed     | ds-DNA     | rinsed     | ds-DNA     | Mg-DNA     | rinsed           | ds-DNA     | Al-DNA     | rinsed |  |  |
| $R_s$           | 0.6(0.3)         | 0.6(0.2)   | 0.7(0.3)   | 0.6(0.4)   | 0.7(0.4)   | 0.6(0.2)   | 0.6(0.2)         | 0.7(0.4)   | 0.6(0.2)   | 0.7(0.4)   | 0.7(0.4)   | 0.6(0.2)   | 0.6(0.2)         | 0.7(0.2)   | 0.5(0.2)   |        |  |  |
| $C_m$           | 6.9(1.3)         | --         | 9.5(2.0)   | 5.2(2.2)   | --         | 3.7(1.5)   | 4.8(2.4)         | 3.7(1.5)   | 4.8(2.4)   | 4.1(1.9)   | --         | 3.7(1.5)   | 4.8(2.4)         | 4.3(1.6)   | 4.1(1.9)   |        |  |  |
| $CPE(Y_o) 10^5$ | 1.7(0.3)         | 3.3(1.3)   | 2.6(0.8)   | 1.7(0.9)   | 2.2(2.0)   | 0.9(0.5)   | 1.3(0.1)         | 0.9(0.5)   | 1.3(0.1)   | 1.6(0.4)   | 2.2(2.0)   | 0.9(0.5)   | 1.3(0.1)         | 1.5(0.2)   | 1.6(0.4)   |        |  |  |
| $n$             | 0.91(0.04)       | 0.92(0.01) | 0.94(0.01) | 0.91(0.01) | 0.92(0.03) | 0.92(0.03) | 0.91(0.01)       | 0.94(0.01) | 0.91(0.01) | 0.94(0.01) | 0.92(0.03) | 0.91(0.01) | 0.91(0.01)       | 0.94(0.01) | 0.95(0.01) |        |  |  |
| $R_{ct}$        | 6.16(0.70)       | 0.45(0.31) | 4.61(0.14) | 5.85(0.53) | 1.21(0.37) | 5.75(0.88) | 5.21(0.46)       | 5.75(0.88) | 5.21(0.46) | 2.58(0.34) | 1.21(0.37) | 5.75(0.88) | 5.21(0.46)       | 2.58(0.34) | 2.73(0.66) |        |  |  |
| $R_x$           | 0.9(0.8)         | --         | 0.8(0.6)   | 2.0(1.0)   | --         | 3.5(1.0)   | 2.2(1.1)         | 3.5(1.0)   | 2.2(1.1)   | 1.4(0.5)   | --         | 3.5(1.0)   | 2.2(1.1)         | 1.4(0.5)   | 0.6(0.2)   |        |  |  |
|                 | $\text{Ni}^{2+}$ |            |            |            |            |            |                  |            |            |            |            |            |                  |            |            |        |  |  |
|                 | $\text{La}^{3+}$ |            |            |            |            |            | $\text{Cu}^{2+}$ |            |            |            |            |            | $\text{Ni}^{2+}$ |            |            |        |  |  |
|                 | ds-DNA           | a-DNA      | nsed       | ds-DNA     | nsed       | ds-DNA     | ds-DNA           | i-DNA      | nsed       | ds-DNA     | nsed       | ds-DNA     | nsed             | ds-DNA     | u-DNA      | nsed   |  |  |
| $s$             | 5(0.1)           | 6(0.2)     | 7(0.3)     | 8(0.2)     | 7(0.3)     | 8(0.2)     | 7(0.3)           | 7(0.3)     | 0.7(0.3)   | 8(0.2)     | 0.7(0.3)   | 8(0.2)     | 0.7(0.3)         | 0.8(0.2)   | 8(0.2)     |        |  |  |
| $m$             | 1(3.3)           |            | 7(1.0)     | 5(2.8)     | 0(1.2)     | 7(1.3)     | 0(1.2)           | 0(1.2)     | 1.3(0.3)   | 2.1(0.2)   | 1.3(0.3)   | 2.1(0.2)   | 1.3(0.3)         | 1.7(0.3)   | 5(0.2)     |        |  |  |
| $PE(Y_o) 10^5$  | 3(1.3)           | 9(1.1)     | 2(0.8)     | 7(1.3)     | 1(0.7)     | 7(1.3)     | 1(0.7)           | 1(0.7)     | 1.1(0.8)   | 1.3(0.7)   | 1.1(0.8)   | 1.3(0.7)   | 1.1(0.8)         | 1.7(0.3)   | 5(0.3)     |        |  |  |
| $n$             | 91(0.04)         | 89(0.02)   | 93(0.01)   | 91(0.04)   | 92(0.04)   | 91(0.04)   | 91(0.04)         | 92(0.04)   | 0.94(0.02) | 0.93(0.03) | 0.94(0.02) | 0.93(0.03) | 0.93(0.03)       | 0.93(0.03) | 95(0.01)   |        |  |  |
| $ct$            | 55(0.37)         | 65(0.67)   | 26(0.30)   | 60(0.13)   | 76(1.0)    | 60(0.13)   | 76(1.0)          | 76(1.0)    | 4.06(0.88) | 6.06(0.77) | 4.06(0.88) | 6.06(0.77) | 4.06(0.88)       | 2.85(0.41) | 07(0.34)   |        |  |  |
| $x$             | 9(1.0)           |            | 8(0.2)     | 0(0.4)     | 5(0.6)     | 0(0.4)     | 5(0.6)           | 5(0.6)     | 0(0.4)     | 9(0.3)     | 0(0.4)     | 9(0.3)     | 0(0.4)           | 9(0.2)     | 8(0.3)     |        |  |  |
|                 | $\text{Zn}^{2+}$ |            |            |            |            |            |                  |            |            |            |            |            |                  |            |            |        |  |  |
|                 | $\text{Cd}^{2+}$ |            |            |            |            |            | $\text{Hg}^{2+}$ |            |            |            |            |            | $\text{Zn}^{2+}$ |            |            |        |  |  |
|                 | ds-DNA           | Zn-DNA     | rinsed     | ds-DNA     | rinsed     | ds-DNA     | ds-DNA           | Cd-DNA     | rinsed     | ds-DNA     | rinsed     | ds-DNA     | rinsed           | ds-DNA     | Hg-DNA     | rinsed |  |  |
| $R_s$           | 0.6(0.2)         | 0.6(0.2)   | 0.7(0.1)   | 0.6(0.2)   | 0.7(0.3)   | 0.6(0.2)   | 0.6(0.2)         | 0.7(0.3)   | 0.7(0.2)   | 0.6(0.3)   | 0.7(0.2)   | 0.6(0.3)   | 0.7(0.2)         | 0.7(0.3)   | 0.6(0.2)   |        |  |  |
| $C_m$           | 2.7(1.4)         | 3.3(1.1)   | 1.3(0.5)   | 4.8(2.4)   | --         | 4.2(1.8)   | 5.0(1.4)         | --         | 4.2(1.8)   | 5.0(1.4)   | 4.2(1.8)   | 5.0(1.4)   | 4.2(1.8)         | --         | 1.5(0.4)   |        |  |  |
| $CPE(Y_o) 10^5$ | 1.2(0.3)         | 1.5(0.2)   | 1.4(0.4)   | 1.3(0.5)   | 1.5(0.8)   | 1.3(0.9)   | 1.4(0.3)         | 1.5(0.8)   | 1.3(0.9)   | 1.4(0.3)   | 1.3(0.9)   | 1.4(0.3)   | 1.3(0.9)         | 3.0(1.0)   | 1.6(0.5)   |        |  |  |
| $n$             | 0.92(0.04)       | 0.95(0.01) | 0.95(0.01) | 0.94(0.01) | 0.89(0.01) | 0.91(0.01) | 0.94(0.01)       | 0.89(0.01) | 0.91(0.01) | 0.91(0.01) | 0.91(0.01) | 0.91(0.01) | 0.91(0.01)       | 0.82(0.05) | 0.90(0.01) |        |  |  |
| $R_{ct}$        | 5.71(0.50)       | 3.40(0.70) | 3.65(0.66) | 5.35(0.12) | 0.79(0.16) | 1.43(0.33) | 5.83(0.23)       | 0.79(0.16) | 1.43(0.33) | 5.83(0.23) | 1.43(0.33) | 5.83(0.23) | 1.43(0.33)       | 0.55(0.39) | 5.09(0.83) |        |  |  |
| $R_x$           | 2.0(0.7)         | 1.3(0.5)   | 1.3(0.5)   | 3.1(1.2)   | --         | 2.9(0.5)   | 3.0(1.3)         | --         | 2.9(0.5)   | 3.0(1.3)   | 2.9(0.5)   | 3.0(1.3)   | 2.9(0.5)         | --         | 2.4(1.0)   |        |  |  |

**Table S2.** Equivalent Circuit Element Values for 25 mer bare ds-DNA in the presence of  $\text{Ca}^{2+}$ ,  $\text{Mg}^{2+}$ ,  $\text{La}^{3+}$ ,  $\text{Cd}^{2+}$  and  $\text{Hg}^{2+}$  respectively. \*

|                            | $\text{Ca}^{2+}$ | $\text{Mg}^{2+}$ | $\text{La}^{3+}$ | $\text{Cd}^{2+}$ | $\text{Hg}^{2+}$ |
|----------------------------|------------------|------------------|------------------|------------------|------------------|
| $R_s$                      | 0.6(0.2)         | 0.7(0.4)         | 0.6(0.2)         | 0.7(0.3)         | 0.7(0.3)         |
| $Q_m$ CPE ( $Y_o$ ) $10^5$ | 3.3(1.3)         | 2.2(2.0)         | 2.9(1.1)         | 1.5(0.8)         | 3.0(1.0)         |
| n                          | 0.92(0.01)       | 0.92(0.03)       | 0.89(0.02)       | 0.89(0.01)       | 0.82(0.05)       |
| $R_{ct}$                   | 0.45(0.31)       | 1.21(0.37)       | 0.65(0.67)       | 0.79(0.16)       | 0.55(0.39)       |
| $Q_d$ CPE ( $Y_o$ ) $10^3$ | 8.4(6.8)         | 1.0(0.5)         | 2.6(1.5)         | 0.9(0.2)         | 0.8(0.2)         |
| n                          | 0.81(0.14)       | 0.72(0.11)       | 0.75(0.11)       | 0.84(0.05)       | 0.65(0.07)       |
| $R_d$                      | 96(63)           | 410(310)         | 197(114)         | 229(90)          | 478(127)         |

\* The impedance spectra were simulated by equivalent circuit as shown in inset of Figure 1b, a parallel combination of  $Q_d$  and  $R_d$ , which provides information about diffusion through the ds-DNA film, is in series with  $R_{ct}$ , the resistance of charge transfer.<sup>1</sup> Where  $R_s$  is the solution resistance and  $Q_m$  represents a non-ideal or leaky ds-DNA film.

1. M. Dijkstra, B. A. Boukamp, B. Kamp and W. P. van Bennekom, *Langmuir*, 2002, **18**, 3105-3112.

**Figure S3.** The relevance of  $\Delta R_{ct}(1)$  and free energy of hydration of divalent metal ions.

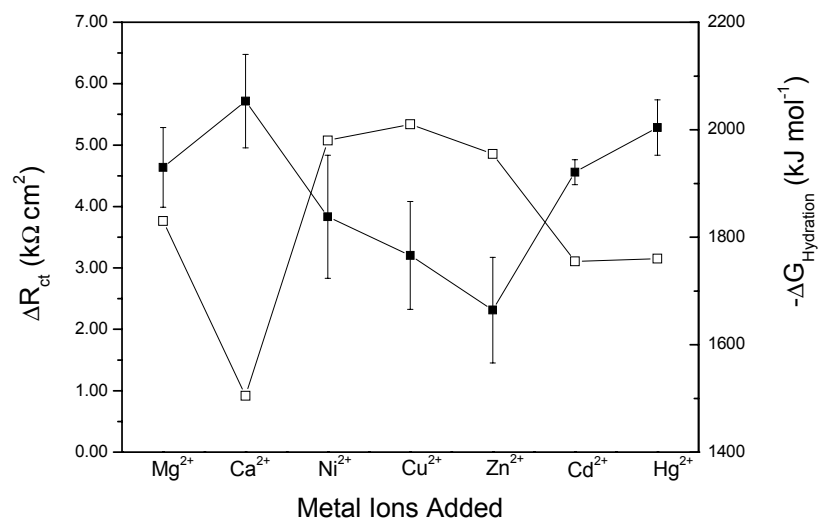

The above figure shows that the  $\Delta R_{ct}(1)$  (■) values are relatively inverse proportional to the free energy of hydration ( $-\Delta G_{Hydration}$ ) (□) for the divalent metal ions. The  $-\Delta G_{Hydration}$  data was from<sup>1</sup>

**Figure S4.** Nyquist plots ( $Z_{\text{img}}$  vs.  $Z_{\text{re}}$ ) of a 25 base pair fully matched DNA (1+2) (squares) monolayer and mismatch DNA (1+3) (circles) assembled on gold microelectrode. In the absence of (filled) and in the presence of (unfilled) (a)  $\text{Ca}^{2+}$ ; (b)  $\text{Zn}^{2+}$ ; (c)  $\text{Cd}^{2+}$  and (d)  $\text{Hg}^{2+}$ . Black solid lines were fitting curves by corresponding equivalent circuits.

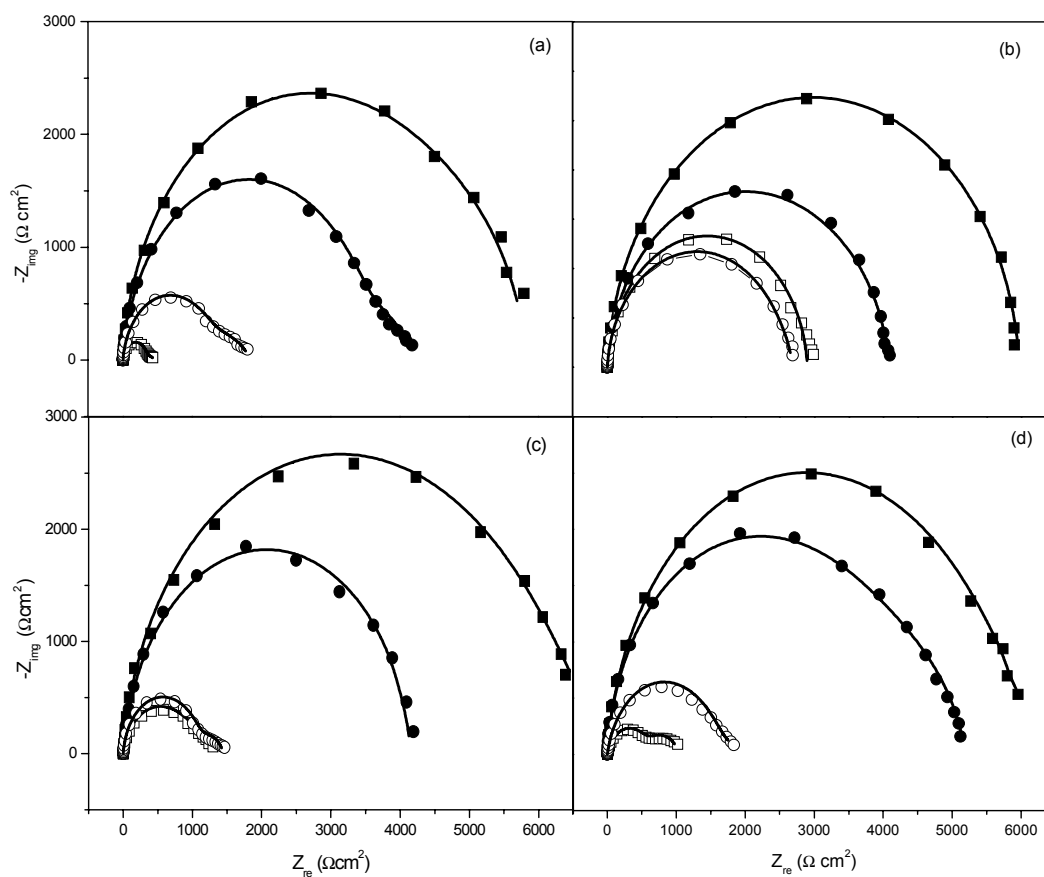

Supplement: b821670c.pdf [file b821670c.pdf]
